# Supplementary material for: Assessment of hand function in women with lymphadenopathy after radical mastectomy
Source: PeerJ. 2021 Apr 13;9:e11252. doi: 10.7717/peerj.11252 (PMC8051334; doi:10.7717/peerj.11252)
Supplement: Supplemental Information 1 [file peerj-09-11252-s001.xlsx]

## Sheet: Women with BCRL
Patient No.	Age(Years)	Occupation	height (m)	weight (kg)	BMI (kg/m2)	Dominance	Side of BCRL(Hand)	duration of BCRL (months)	Cancer treatment received	No of nodes removed	Power R(KG)	Power L (KG)	Tip R (KG)	Tip L (KG)	Key R (KG)	Key L (KG)	Tripo R (KG)	Tripo L (KG)	Hand R(sec	Hand L(sec)	Card R(sec)	Card L(sec)	Pick R(sec)	Pick L(sec)	Simu R(sec)	Simu L(sec)	Stack R(sec)	Stack L(sec)	Large R(sec)	Large L(sec)	Heavy R(sec	Heavy L(sec
1	54	Housewife	1.7	70	24.2215	Right	Right	4	Surgery	8	12.5	11	3	2.8	6	6	4.7	4.5	17	66	5	7	6	7	8	9.3	4	4	5	7	5	7
2	52	Housewife	1.66	68	24.677	Right	Right	5	Surgery and radiotherapy	7	20	18	7	6.8	7.2	7.5	5.7	5.5	18	64	7	7	6	7	8	9.3	5	4	5	7	5	7
3	37	Employee	1.65	65	23.8751	Right	Right	6	surgery and chemotherapy	10	12	16	5.5	5.3	7.5	7	7.2	7	12	28	5	8	6	8	8	9.3	3	3	4	8	4	4
4	64	Housewife	1.5	57	25.3333	Left	Left	4	Radiotherapy and chemotherapy	12	15	17	3.5	3.3	6	5.5	4.7	4.5	24	38	7	9	11	14	13	14.3	6	9	7	11	5	7
5	62	Housewife	1.55	58	24.1415	Right	Right	8	surgery and chemotherapy	11	30	27	3.5	3.3	5.2	4.1	4.5	4.3	42	88	7	7	9	7	9	10.3	5	5	5	7	5	5
6	64	Housewife	1.48	54	24.653	Left	Left	10	surgery and chemotherapy	9	32	33	3.6	3.4	7.5	6	5.2	5	15	45	6	8	6	11	7	8.3	3	5	5	8	5	8
7	52	Professor	1.45	50	23.7812	Left	Left	12	Surgery	8	32	33	5	4.8	8.5	8	6	5.8	14	44	7	8	7	7	9	10.3	5	6	6	12	6	9
8	53	Housewife	1.49	54	24.3232	Right	Right	15	Surgery	10	30	21	6	5.8	8.5	9	5.7	5.5	48	61	6	5	6	8	9	10.3	4	4	4	7	4	3
9	63	Housewife	1.65	65	23.8751	Left	Left	10	Surgery and radiotherapy	12	30	30	4	3.8	4.6	4.5	4.6	4.4	109	134	9	11	5	7	10	11.3	3	5	5	8	4	4
10	58	Housewife	1.64	68	25.2826	Right	Right	8	surgery and chemotherapy	8	25	18	4	3.8	5	4	5.3	5.1	83	79	13	10	7	6	9	10.3	4	3	4	7	5	7
11	52	Housewife	1.68	69	24.4473	Right	Right	6	Surgery and radiotherapy	12	35	30	3.5	3.3	6.1	7.8	6.2	6	19	54	6	6	6	6	10	11.3	5	3	5	7	5	8
12	42	Housewife	1.57	63	25.5588	Left	Left	12	Surgery	13	45	46	6	5.8	7	6.1	6.7	6.5	83	55	9	13	7	7	7	8.3	4	5	3	5	4	4
13	52	Housewife	1.55	58	24.1415	Left	Left	5	surgery and chemotherapy	12	18	22	6	5.8	6.5	6	6.7	6.5	15	108	4	5	7	8	8	9.3	4	4	3	3	3	4
14	59	Teacher	1.53	59	25.204	Left	Left	7	Surgery	10	30	32	4	3.8	5.2	4.5	5	4.8	13	31	7	8	6	7	8	9.3	4	4	4	4	4	8
15	65	Housewife	1.69	70	24.5089	Right	Right	10	surgery and chemotherapy	10	42	32	4	3.8	5.5	6.3	6.2	6	22	49	8	5	10	12	11	12.3	4	3	5	4	5	7
16	60	Housewife	1.72	75	25.3515	Right	Right	12	Surgery and radiotherapy	12	40	35	5	4.8	6.5	6.2	6.7	6.5	14	57	6	5	6	5	9	10.3	3	4	4	3	4	7
17	60	Housewife	1.58	63	25.2363	Right	Right	15	surgery and chemotherapy	6	20	18	4	3.8	6.5	6	5.9	5.7	28	51	6	5	5	5	8	9.3	4	4	4	3	4	7
18	51	Housewife	1.45	50	23.7812	Left	Left	11	Surgery	10	25	25	5	4.8	9	8	7.2	7	27	78	6	12	7	7	7	8.3	3	5	3	5	3	6
19	41	Housewife	1.49	55	24.7737	Right	Right	9	surgery and chemotherapy	12	18	16	3	2.8	5.5	6	4.2	4	36	98	9	8	8	11	9	10.3	4	3	5	4	5	4
20	65	Housewife	1.57	58	23.5304	Right	Right	12	Surgery and radiotherapy	13	35	32	4	3.8	6.5	5	4.7	4.5	50	121	9	9	10	9	9	10.3	6	4	5	4	6	4
21	59	Housewife	1.58	58	23.2335	Right	Right	15	Surgery	12	35	31	4	3.8	5.5	6.5	4.7	4.5	16	38	10	7	8	7	8	9.3	3	3	3	3	4	4
22	54	Housewife	1.6	65	25.3906	Left	Left	10	surgery and chemotherapy	10	19	22	3.5	3.3	4.2	3.2	3.2	3	14	24	6	7	8	8	7	8.3	4	6	4	5	4	4
23	61	Housewife	1.65	65	23.8751	Left	Left	8	Surgery	12	19	23	4	3.8	4.5	4	4.2	4	11	28	4	6	5	6	7	8.3	3	4	3	3	3	4
24	65	Professor	1.67	68	24.3824	Right	Right	12	Surgery	10	20	18	2.5	2.3	6	6.5	4.7	4.5	11	27	10	8	8	7	9	10.3	3	3	6	5	6	5
25	39	Housewife	1.59	62	24.5243	Right	Right	10	Surgery and radiotherapy	11	10	8	2.5	2.3	4.5	6	6.2	6	27	48	8	7	6	6	7	8.3	3	3	4	4	4	4
26	63	Housewife	1.54	60	25.2994	Right	Right	5	Surgery and radiotherapy	13	15	13	2.5	2.3	4.5	4.5	4.7	4.5	28	97	10	12	8	7	9	10.3	4	3	5	4	4	4
27	56	Housewife	1.63	67	25.2174	Right	Right	4	surgery and chemotherapy	12	18	14	4	3.8	5.5	6.2	5.3	5.1	51	49	8	6	5	5	7	8.3	4	3	3	3	4	3
28	65	Housewife	1.54	55	23.1911	Right	Right	6	Surgery	10	12	10	3	2.8	5	7	5.4	5.2	31	111	14	16	10	8	8	9.3	3	3	4	4	4	4
29	50	Housewife	1.52	55	23.8054	Right	Right	7	surgery and chemotherapy	8	15	14	5	4.8	7.5	7	7.2	7	46	58	4	7	7	5	6	7.3	3	3	3	2	3	2
30	41	Employee	1.6	65	25.3906	Right	Right	4	Surgery and radiotherapy	12	19	15	4	3.8	7.5	6	5.4	5.2	11	37	6	8	5	5	9	10.3	3	2	3	3	3	3
31	60	Housewife	1.58	58	23.2335	Right	Right	7	Surgery	14	10	9	3.2	3	4.5	5	3.2	3	94	132	11	13	10	7	8	9.3	3	3	4	3	4	3
Mean	55.4516		1.58387	61.5161	24.4594			8.67742		10.6129	23.8226	22.2258	4.12258	3.92258	6.1129	5.98065	5.39677	5.19677	33.1935	64.4516	7.51613	8.16129	7.12903	7.41935	8.41935	9.71935	3.83871	3.96774	4.29032	5.25806	4.32258	5.16129
SD	8.38586		0.0751743	6.32388	0.72896			3.40966		1.96091	9.90501	9.27257	1.1304	1.1304	1.317	1.34918	1.07501	1.07501	26.4013	32.0415	2.46131	2.7337	1.72708	2.10988	1.38502	1.38502	0.898027	1.35361	1.03902	2.46262	0.871286	1.89907

## Sheet: Women without BCRL
Subject ID	Age(Years)	height (m)	weight (kg)	BMI (kg/m2)	Dominance	Power R(KG)-N	Power L 9KG)-N	Tip R (KG)-N	Tip L (KG)-N	Key R (KG)-N	Key L (KG)-N	Tripo R (KG)-N	Tripo L (KG)-N	Hand R(sec)-N	Hand L(sec)-N	Card R(sec)-N	Card L(sec)-N	Pick R(sec)-N	Pick L(sec)-N	Simu R(sec)-N	Simu L(sec)-N	Stack R(sec)-N	Stack L(sec)-N	Large R(sec)-N	Large L(sec)-N	Heavy R(sec)-N	Heavy L(sec)-N
1	50	1.55	58	24.1415	Left	17	22	5	4.8	6	6	11.2	11	15	40	3	3	4	4	5	5.8	4	3	3	4	3	4
2	48	1.58	60	24.0346	Right	25	22	10	9.8	11	11	12.2	12	14	35	3	3	4	5	5	5.8	4	3	3	4	3	4
3	37	1.6	62	24.2188	Left	17	25	6.5	6.3	12	12	12.2	12	12	22	3	3	3	5	6	6.8	3	3	3	4	2	2
4	65	1.65	67	24.6097	Right	20	23	5.5	5.3	6	5.5	8.2	8	18	26	4	5	5	6	7	7.8	4	5	4	7	3	4
5	60	1.5	55	24.4444	Left	35	37	5.5	5.3	5.2	4.1	8.2	8	35	45	4	5	4	4	5	5.8	4	4	3	2	3	3
6	62	1.66	64	23.2254	Left	37	26	5.6	5.4	7.5	6	5.2	5	12	35	3	4	5	4	4	4.8	3	5	2	3	3	5
7	50	1.57	58	23.5304	Right	37	31	5	4.8	12	12	12.2	12	11	32	4	5	4	3	5	5.8	4	4	3	7	4	6
8	55	1.51	55	24.1217	Left	38	30	6	5.8	13	13	12.2	12	35	40	3	4	5	5	4	4.8	4	3	2.5	4	2	2
9	65	1.61	60	23.1473	Right	38	30	4	3.8	6	4.5	7.2	7	55	40	5	6	4	4	6	6.8	3	4	3	5	2.5	3
10	60	1.68	68	24.093	Right	30	27	5	4.8	5	4	5.3	5.1	45	55	6	5	4	4	5	5.8	4	3	2.5	4	2	4
11	50	1.63	65	24.4646	Right	40	36	5	4.8	6.1	7.8	6.2	6	15	35	3	4	5	6	6	6.8	3	3	3.5	5	3	5
12	40	1.69	67	23.4586	Left	45	35	10	9.8	9	6.1	7.7	7.5	40	45	4	5	4	7	5	5.8	4	4	2.5	2	2.5	2
13	50	1.7	70	24.2215	Right	28	23	8	7.8	6.5	6	6.7	6.5	11	50	4	5	4	4	6	6.8	4	4	2.5	2	3	3
14	62	1.65	68	24.977	Right	35	26	6	5.8	5.2	4.5	6.2	6	12	31	3	4	5	7	6	6.8	3	4	3	2	2	5
15	63	1.6	66	25.7812	Left	42	46	4	3.8	5.5	6.3	6.2	6	15	35	4	5	6	6	4	4.8	2	4	3.5	2	3	4
16	64	1.57	60	24.3418	Right	40	40	8	7.8	6.5	6.2	6.7	6.5	11	35	2	5	4	5	5	5.8	3	4	3	2	2.6	3
17	63	1.48	55	25.1096	Right	28	22	4	3.8	6.5	6	5.9	5.7	18	51	3	4	5	5	4	4.8	4	4	3	2	2	3
18	50	1.52	57	24.6711	Right	30	24	5	4.8	12	13	11.2	11	16	32	3	4	5	3	5	5.8	3	3	3	2	2.6	3
19	45	1.58	59	23.634	Right	27	23	4	3.8	5.5	6	6.2	6	25	65	4	4	5	7	5	5.8	4	3	2	2	3	3
20	64	1.64	67	24.9108	Left	35	36	4	3.8	6.5	5	6.2	6	35	55	4	5	6	3	5	5.8	4	4	3	2	4	3
21	55	1.69	69	24.1588	Right	35	36	4	3.8	5.5	6.5	5.7	5.5	12	38	7	7	8	7	4	4.8	3	3	3	2.5	2.8	3
22	57	1.7	72	24.9135	Left	28	23	4	3.8	6	5	3.2	3	12	24	4	4	4	4	5	5.8	2	3	4	3	3	2
23	60	1.55	58	24.1415	Right	29	23	4	3.8	7	8	4.2	4	10	28	4	4	5	6	5	5.8	3	4	3	2.5	3	2
24	65	1.45	50	23.7812	Right	30	22	4	3.8	6	6.5	5.7	5.5	10	27	7	8	5	7	6	6.8	3	4	2	3	4	2
25	40	1.5	55	24.4444	Left	18	25	4	3.8	6	6	6.2	6	16	48	6	7	5	3	3	3.8	3	3	4	3	2.9	3
26	60	1.46	54	25.3331	Left	20	23	4	3.8	7	4.5	4.7	4.5	17	50	6	8	5	7	5	5.8	2	3	2	2	4	3
27	60	1.49	56	25.2241	Right	22	24	4	3.8	5.5	6.2	6.3	6.1	35	41	7	6	5	5	6	6.8	3	3	3	2.5	2.7	2
28	63	1.6	65	25.3906	Left	22	23	5	4.8	5	7	5.4	5.2	21	45	9	6	5	8	5	5.8	3	3	4	3	2.6	3
29	55	1.72	75	25.3515	Left	23	22	5	4.8	12	13	12.2	12	28	43	3	4	7	5	5	5.8	3	3	3	1.5	3	2
30	50	1.5	58	25.7778	Right	25	23	4	3.8	12	12	11.2	11	10	37	4	4	5	5	6	6.8	3	2	3	2.6	3	2.5
31	60	1.6	60	23.4375	Right	15	22	4	3.8	6	5	5.2	5	35	50	5	7	6	7	5	5.8	3	3	2	2.7	4	2.6
Mean	55.7419	1.58806	61.7097	24.4223		29.3871	27.4194	5.22903	5.02903	7.45161	7.24839	7.52581	7.32581	21.1613	39.8387	4.32258	4.93548	4.87097	5.19355	5.09677	5.89677	3.29032	3.48387	2.93548	3.07419	2.90968	3.16452
SD	8.08689	0.0784185	6.1057	0.724949		8.24491	6.51037	1.68804	1.68804	2.62816	2.93381	2.77824	2.77824	12.174	10.1328	1.59973	1.36469	0.991361	1.44728	0.830857	0.830857	0.642575	0.676805	0.587962	1.40332	0.601861	1.05784

## Sheet: T-TEST-COMPARISON
Power R (KG)	Power R(KG)-N	Power L (KG)	Power L 9KG)-N	Tip R (KG)	Tip R (KG)-N	Tip L (KG)	Tip L (KG)-N	Key R (KG)	Key R (KG)-N	Key L (KG)	Key L (KG)-N	Tripo R (KG)	Tripo R (KG)-N	Tripo L (KG)	Tripo L (KG)-N	Hand R(sec	Hand R(sec)-N	Hand L(sec)	Hand L(sec)-N	Card R(sec)	Card R(sec)-N	Card L(sec)	Card L(sec)-N	Pick R(sec)	Pick R(sec)-N	Pick L(sec)	Pick L(sec)-N	Simu R(sec)	Simu R(sec)-N	Simu L(sec)	Simu L(sec)-N	Stack R(sec)	Stack R(sec)-N	Stack L(sec)	Stack L(sec)-N	Large R(sec)	Large R(sec)-N	Large L(sec)	Large L(sec)-N	Heavy R(sec	Heavy R(sec)-N	Heavy L(sec	Heavy L(sec)-N
12.5	17	11	22	3	5	2.8	4.8	6	6	6	6	4.7	11.2	4.5	11	17	15	66	40	5	3	7	3	6	4	7	4	8	5	9.3	5.8	4	4	4	3	5	3	7	4	5	3	7	4
20	25	18	22	7	10	6.8	9.8	7.2	11	7.5	11	5.7	12.2	5.5	12	18	14	64	35	7	3	7	3	6	4	7	5	8	5	9.3	5.8	5	4	4	3	5	3	7	4	5	3	7	4
12	17	16	25	5.5	6.5	5.3	6.3	7.5	12	7	12	7.2	12.2	7	12	12	12	28	22	5	3	8	3	6	3	8	5	8	6	9.3	6.8	3	3	3	3	4	3	8	4	4	2	4	2
15	20	17	23	3.5	5.5	3.3	5.3	6	6	5.5	5.5	4.7	8.2	4.5	8	24	18	38	26	7	4	9	5	11	5	14	6	13	7	14.3	7.8	6	4	9	5	7	4	11	7	5	3	7	4
30	35	27	37	3.5	5.5	3.3	5.3	5.2	5.2	4.1	4.1	4.5	8.2	4.3	8	42	35	88	45	7	4	7	5	9	4	7	4	9	5	10.3	5.8	5	4	5	4	5	3	7	2	5	3	5	3
32	37	33	26	3.6	5.6	3.4	5.4	7.5	7.5	6	6	5.2	5.2	5	5	15	12	45	35	6	3	8	4	6	5	11	4	7	4	8.3	4.8	3	3	5	5	5	2	8	3	5	3	8	5
32	37	33	31	5	5	4.8	4.8	8.5	12	8	12	6	12.2	5.8	12	14	11	44	32	7	4	8	5	7	4	7	3	9	5	10.3	5.8	5	4	6	4	6	3	12	7	6	4	9	6
30	38	21	30	6	6	5.8	5.8	8.5	13	9	13	5.7	12.2	5.5	12	48	35	61	40	6	3	5	4	6	5	8	5	9	4	10.3	4.8	4	4	4	3	4	2.5	7	4	4	2	3	2
30	38	30	30	4	4	3.8	3.8	4.6	6	4.5	4.5	4.6	7.2	4.4	7	109	55	134	40	9	5	11	6	5	4	7	4	10	6	11.3	6.8	3	3	5	4	5	3	8	5	4	2.5	4	3
25	30	18	27	4	5	3.8	4.8	5	5	4	4	5.3	5.3	5.1	5.1	83	45	79	55	13	6	10	5	7	4	6	4	9	5	10.3	5.8	4	4	3	3	4	2.5	7	4	5	2	7	4
35	40	30	36	3.5	5	3.3	4.8	6.1	6.1	7.8	7.8	6.2	6.2	6	6	19	15	54	35	6	3	6	4	6	5	6	6	10	6	11.3	6.8	5	3	3	3	5	3.5	7	5	5	3	8	5
45	45	46	35	6	10	5.8	9.8	7	9	6.1	6.1	6.7	7.7	6.5	7.5	83	40	55	45	9	4	13	5	7	4	7	7	7	5	8.3	5.8	4	4	5	4	3	2.5	5	2	4	2.5	4	2
18	28	22	23	6	8	5.8	7.8	6.5	6.5	6	6	6.7	6.7	6.5	6.5	15	11	108	50	4	4	5	5	7	4	8	4	8	6	9.3	6.8	4	4	4	4	3	2.5	3	2	3	3	4	3
30	35	32	26	4	6	3.8	5.8	5.2	5.2	4.5	4.5	5	6.2	4.8	6	13	12	31	31	7	3	8	4	6	5	7	7	8	6	9.3	6.8	4	3	4	4	4	3	4	2	4	2	8	5
42	42	32	46	4	4	3.8	3.8	5.5	5.5	6.3	6.3	6.2	6.2	6	6	22	15	49	35	8	4	5	5	10	6	12	6	11	4	12.3	4.8	4	2	3	4	5	3.5	4	2	5	3	7	4
40	40	35	40	5	8	4.8	7.8	6.5	6.5	6.2	6.2	6.7	6.7	6.5	6.5	14	11	57	35	6	2	5	5	6	4	5	5	9	5	10.3	5.8	3	3	4	4	4	3	3	2	4	2.6	7	3
20	28	18	22	4	4	3.8	3.8	6.5	6.5	6	6	5.9	5.9	5.7	5.7	28	18	51	51	6	3	5	4	5	5	5	5	8	4	9.3	4.8	4	4	4	4	4	3	3	2	4	2	7	3
25	30	25	24	5	5	4.8	4.8	9	12	8	13	7.2	11.2	7	11	27	16	78	32	6	3	12	4	7	5	7	3	7	5	8.3	5.8	3	3	5	3	3	3	5	2	3	2.6	6	3
18	27	16	23	3	4	2.8	3.8	5.5	5.5	6	6	4.2	6.2	4	6	36	25	98	65	9	4	8	4	8	5	11	7	9	5	10.3	5.8	4	4	3	3	5	2	4	2	5	3	4	3
35	35	32	36	4	4	3.8	3.8	6.5	6.5	5	5	4.7	6.2	4.5	6	50	35	121	55	9	4	9	5	10	6	9	3	9	5	10.3	5.8	6	4	4	4	5	3	4	2	6	4	4	3
35	35	31	36	4	4	3.8	3.8	5.5	5.5	6.5	6.5	4.7	5.7	4.5	5.5	16	12	38	38	10	7	7	7	8	8	7	7	8	4	9.3	4.8	3	3	3	3	3	3	3	2.5	4	2.8	4	3
19	28	22	23	3.5	4	3.3	3.8	4.2	6	3.2	5	3.2	3.2	3	3	14	12	24	24	6	4	7	4	8	4	8	4	7	5	8.3	5.8	4	2	6	3	4	4	5	3	4	3	4	2
19	29	23	23	4	4	3.8	3.8	4.5	7	4	8	4.2	4.2	4	4	11	10	28	28	4	4	6	4	5	5	6	6	7	5	8.3	5.8	3	3	4	4	3	3	3	2.5	3	3	4	2
20	30	18	22	2.5	4	2.3	3.8	6	6	6.5	6.5	4.7	5.7	4.5	5.5	11	10	27	27	10	7	8	8	8	5	7	7	9	6	10.3	6.8	3	3	3	4	6	2	5	3	6	4	5	2
10	18	8	25	2.5	4	2.3	3.8	4.5	6	6	6	6.2	6.2	6	6	27	16	48	48	8	6	7	7	6	5	6	3	7	3	8.3	3.8	3	3	3	3	4	4	4	3	4	2.9	4	3
15	20	13	23	2.5	4	2.3	3.8	4.5	7	4.5	4.5	4.7	4.7	4.5	4.5	28	17	97	50	10	6	12	8	8	5	7	7	9	5	10.3	5.8	4	2	3	3	5	2	4	2	4	4	4	3
18	22	14	24	4	4	3.8	3.8	5.5	5.5	6.2	6.2	5.3	6.3	5.1	6.1	51	35	49	41	8	7	6	6	5	5	5	5	7	6	8.3	6.8	4	3	3	3	3	3	3	2.5	4	2.7	3	2
12	22	10	23	3	5	2.8	4.8	5	5	7	7	5.4	5.4	5.2	5.2	31	21	111	45	14	9	16	6	10	5	8	8	8	5	9.3	5.8	3	3	3	3	4	4	4	3	4	2.6	4	3
15	23	14	22	5	5	4.8	4.8	7.5	12	7	13	7.2	12.2	7	12	46	28	58	43	4	3	7	4	7	7	5	5	6	5	7.3	5.8	3	3	3	3	3	3	2	1.5	3	3	2	2
19	25	15	23	4	4	3.8	3.8	7.5	12	6	12	5.4	11.2	5.2	11	11	10	37	37	6	4	8	4	5	5	5	5	9	6	10.3	6.8	3	3	2	2	3	3	3	2.6	3	3	3	2.5
10	15	9	22	3.2	4	3	3.8	4.5	6	5	5	3.2	5.2	3	5	94	35	132	50	11	5	13	7	10	6	7	7	8	5	9.3	5.8	3	3	3	3	4	2	3	2.7	4	4	3	2.6
0.0193207		0.0132673

## Sheet: t-test_Age
t-Test: Two-Sample Assuming Equal Variances
	Variable 1	Variable 2
Mean	55.4516	55.7419
Variance	70.3226	65.3978
Observations	31	31
Pooled Variance	67.8602
Hypothesized Mean Difference	0
df	60
t Stat	-0.138752
P(T<=t) one-tail	0.445055
t Critical one-tail	1.67065
P(T<=t) two-tail	0.890111
t Critical two-tail	2.0003
t-Test: Two-Sample Assuming Equal Variances
	Variable 1	Variable 2
t-Test: Two-Sample Assuming Equal Variances

## Sheet: t-test_BMI
t-Test: Two-Sample Assuming Equal Variances
	Variable 1	Variable 2
Mean	24.4594	24.4223
Variance	0.531383	0.525551
Observations	31	31
Pooled Variance	0.528467
Hypothesized Mean Difference	0
df	60
t Stat	0.200817
P(T<=t) one-tail	0.42076
t Critical one-tail	1.67065
P(T<=t) two-tail	0.841521
t Critical two-tail	2.0003
t-Test: Two-Sample Assuming Equal Variances

## Sheet: t-test_Hand dominance
t-Test: Two-Sample Assuming Equal Variances
	Variable 1	Variable 2
Mean	1.32258	1.41935
Variance	0.225806	0.251613
Observations	31	31
Pooled Variance	0.23871
Hypothesized Mean Difference	0
df	60
t Stat	-0.779813
P(T<=t) one-tail	0.219283
t Critical one-tail	1.67065
P(T<=t) two-tail	0.438566
t Critical two-tail	2.0003

## Sheet: t-test
	Age(Years)-p	Age(Years)-c	BMI (kg/m2)-p	BMI (kg/m2)-c	Dominance-p	Dominance-c
	54	50	24.2215	24.1415	1	2
	52	48	24.677	24.0346	1	1
	37	37	23.8751	24.2188	1	2
	64	65	25.3333	24.6097	2	1
	62	60	24.1415	24.4444	1	2
	64	62	24.653	23.2254	2	2
	52	50	23.7812	23.5304	2	1
	53	55	24.3232	24.1217	1	2
	63	65	23.8751	23.1473	2	1
	58	60	25.2826	24.093	1	1
	52	50	24.4473	24.4646	1	1
	42	40	25.5588	23.4586	2	2
	52	50	24.1415	24.2215	2	1
	59	62	25.204	24.977	2	1
	65	63	24.5089	25.7812	1	2
	60	64	25.3515	24.3418	1	1
	60	63	25.2363	25.1096	1	1
	51	50	23.7812	24.6711	2	1
	41	45	24.7737	23.634	1	1
	65	64	23.5304	24.9108	1	2
	59	55	23.2335	24.1588	1	1
	54	57	25.3906	24.9135	2	2
	61	60	23.8751	24.1415	2	1
	65	65	24.3824	23.7812	1	1
	39	40	24.5243	24.4444	1	2
	63	60	25.2994	25.3331	1	2
	56	60	25.2174	25.2241	1	1
	65	63	23.1911	25.3906	1	2
	50	55	23.8054	25.3515	1	2
	41	50	25.3906	25.7778	1	1
	60	60	23.2335	23.4375	1	1
Mean	55.4516		24.4594	24.4223
SD	8.38586		0.72896	0.724949	0.438566
t	0.890111		0.841521
